# Supplementary material for: Composite PS-b-P4VP/Ag and PS-b-P4VP/Au thin films fabricated via a multilevel self-assembly process
Source: Royal Society of Chemistry journal article supplement (doi:10.1039/c6ra12435f), 2016-01-01
Supplement: c6ra12435f1.pdf [file c6ra12435f1.pdf]

## **Composite PS-*b*-P4VP/Ag and PS-*b*-P4VP/Au thin films fabricated via a multilevel self-assembly process**

Xingjuan Zhao<sup>a</sup>, Xiaokai Zhang<sup>b</sup>, Hong-Guo Liu<sup>a,\*</sup>

<sup>a</sup> *Key Laboratory for Colloid and Interface Chemistry of Education Ministry, Shandong University, Jinan 250100, P. R. China. Email: hgliu@sdu.edu.cn*

<sup>b</sup> *College of Physics and Electronics, Shandong Normal University, Jinan 250014, P. R. China*

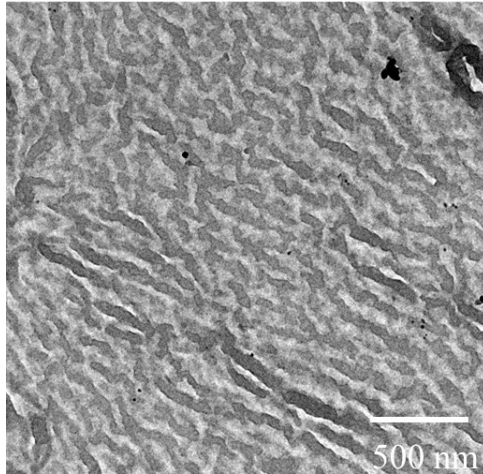

**Fig. S1.** TEM micrographs of thin films formed at the air/water interface: (a)  $V_{\text{DMF}}/V_{\text{CHCl}_3} = 6/4$ , the fabrication time is 8h, the concentrations of polymer and  $\text{AgNO}_3$  are  $0.2 \text{ mg mL}^{-1}$  and  $0.01 \text{ mol L}^{-1}$ , respectively.

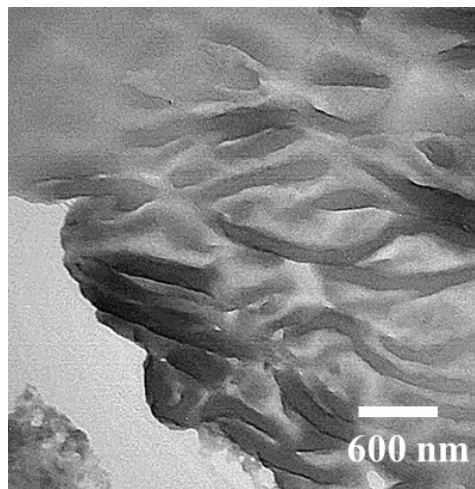

**Figure S2.** TEM micrographs of the aggregates formed in the upper-phase (the aqueous solution),  $\text{HAuCl}_4$  aqueous solution with a concentration of  $0.001 \text{ mol L}^{-1}$  and  $V_{\text{DMF}}/V_{\text{CHCl}_3} = 6/4$ .

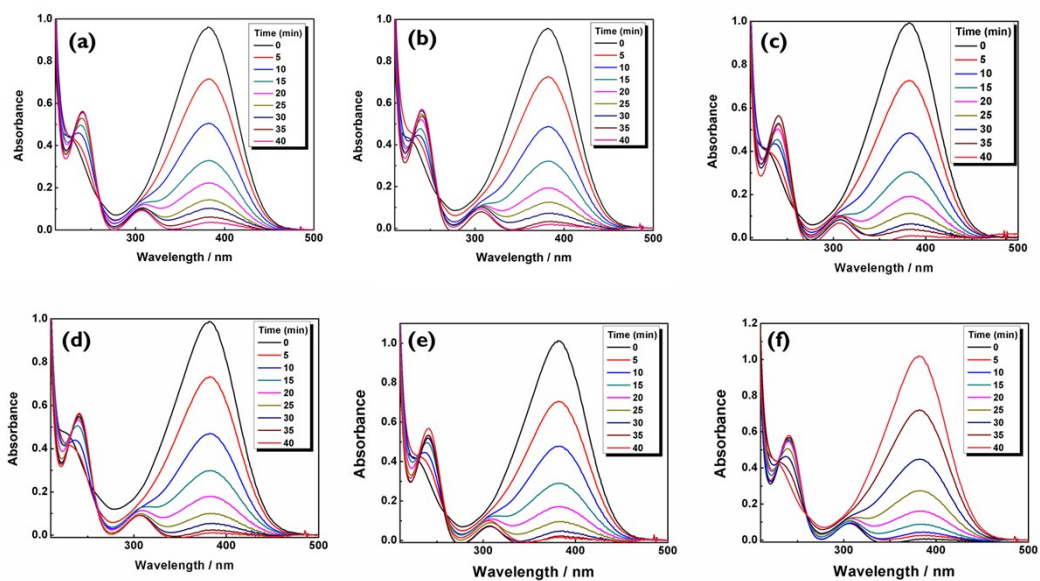

**Figure S3.** Catalytic reduction of 4-NA. Typical time-dependent UV-vis absorption spectra of the reaction solutions in the presence of composite thin films of PS-b-P4VP/Ag in six successive cycles (a-f).

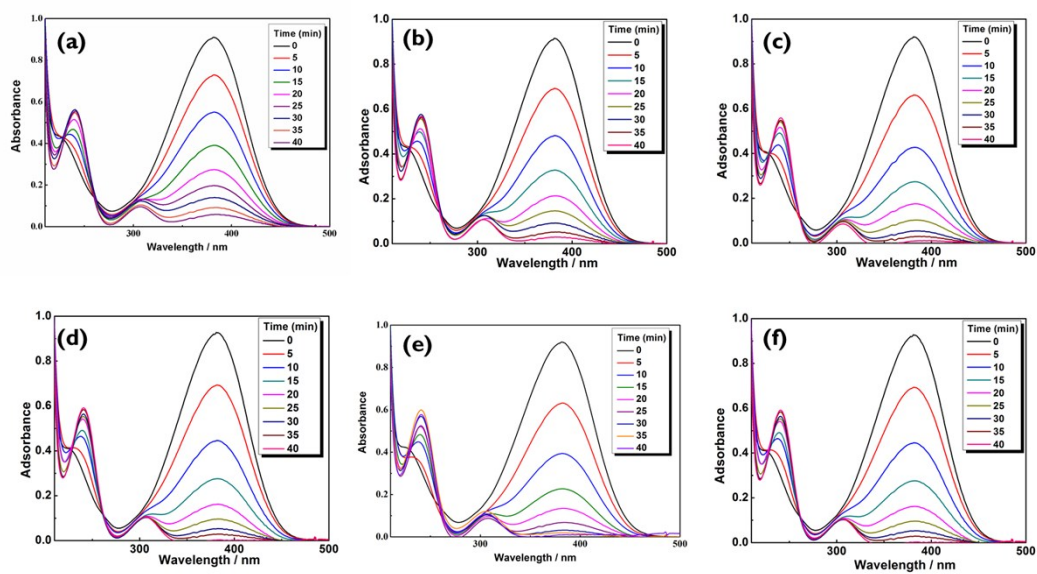

**Figure S4.** Catalytic reduction of 4-NA. Typical time-dependent UV-vis absorption spectra of the reaction solutions in the presence of composite thin films of PS-b-P4VP/Au in six successive cycles (a-f).
